# Supplementary material
Source: Elsevier journal article supplement (https://www.genome.arizona.edu/sites/genome.arizona.edu/files/mmc1.pdf)
Supplement: mmc1 [file mmc1.pdf]

## Supplemental information

### **Rice Gene Index: A comprehensive pan-genome database for comparative and functional genomics of Asian rice**

Zhichao Yu (于志超), Yongming Chen (陈永明), Yong Zhou (周勇), Yulu Zhang (张雨露), Mengyuan Li (李梦圆), Yidan Ouyang (欧阳亦聃), Dmytro Chebotarov, Ramil Mauleon, Hu Zhao (赵虎), Weibo Xie (谢为博), Kenneth L. McNally, Rod A. Wing, Weilong Guo (郭伟龙), and Jianwei Zhang (张建伟)

## Supplemental Information

### Supplemental Information 1 – Functional annotation of Ortholog Gene Index (OGI) genes across species

To gain insights into the evolutionary history of OGI genes, we aligned their protein sequences to the non-redundant protein (NR) database partitioned into 13 taxonomic levels (Wang et al., 2018). We found that new genes explosively emerged with the appearance of *Poaceae* (PS10) and *O. sativa* (PS13) respectively (Supplemental Figures 1B, C, see Methods) and the specific genes are younger and shorter (T-test,  $p = 2e-16$ ) than core genes (Supplemental Figure 1D). By functional analysis with InterPro domains screened for the gene set, we found that ~88.35% of coding genes contained InterPro domains in the core gene set, a much higher proportion than that in the specific gene set (~35.63%), implying that accession-specific genes may be new genes or pseudogenes. Furthermore, core genes are enriched in essential functions for development, regulation of transcription, DNA-binding transcription factor activity, and so on (using Gene Ontology, GO) (Supplemental Figure 3A), whereas accession-specific genes are enriched in biotic responses like viral penetration into host nucleus (Supplemental Figure 3B).

### Supplemental Information 2 – Extra useful functional applications

The “JBrowse” is deployed to present various data tracks like coding and non-coding annotations, transcriptome data, etc. (Figure 1I). “GOEnrichment” (Figure 1H) provides GO enrichment analysis, “GeneDescription” may retrieve gene functions by batches, “OGI” displays the topological structure of each Ortholog Gene Index, and “Download” supplies the genomes and annotations of 16 rice accessions.

### Supplemental Information 3 – System construction

Rice Gene Index (RGI) is hosted on a Linux operation system and Nginx web server (<https://www.nginx.com>) (Figure 1B). All featured data (e.g., homologs, collinearity blocks, transcripts, AS events, and gene functions) of RGI were organized and stored in the MySQL database (<http://www.mysql.com>). The website was constructed by using Shiny (<https://shiny.rstudio.com>) and Django

(<https://www.djangoproject.com>) for the web framework, Bootstrap (<https://getbootstrap.com>) for the front-end design, and Echarts (<https://echarts.apache.org>) for data visualization.

## **Methods**

### **Iso-Seq data processing**

Iso-Seq data were sequenced from leaves and roots in 14 accessions, and panicles in 9 accessions. The leaves and roots data were processed to high quality (>98%) reads from PacBio subreads raw data with `-ccs_max_length 15000 -ccs_min_length 50 -ccs_polish false -hq_cutoff 0.98 -Maximum_Fuzzy_Junction_Difference 5 -Minimum_Mapped_Concordance 95 -Minimum_Mapped_Coverage 99 -Minimum_Mapped_Length 50 -Require_and_Trim_Poly(A)_Tail true -Run_Clustering true`, using SMRTLink 9.0.0.92188 from Pacific Biosciences. The panicles data were sequenced in a mixed pool (9 samples), and the data were processed to circular consensus sequence (CCS) from PacBio subreads raw data with `-Maximum_CCS_Read_Length 50000 -Minimum_CCS_Read_Length 10 -Minimum_Number_of_Passes 3 -Minimum_Predicted_Accuracy 0.98`, using SMRTLink 8.0.0.80529. Then, we split 9 sample data by barcode and generated high quality (>98%) reads, using the standard IsoSeq3 (<https://github.com/PacificBiosciences/IsoSeq>) pipeline. All high-quality (>98%) reads were mapped to the respective genome using minimap2 (v2.17) (Li, 2018). TAMA (Kuo et al., 2020) with `-x no_cap -i 0.95` was used to collapse redundant transcripts. Furthermore, TAMA was used to merge the transcripts between tissues and those from CDS prediction.

### **RNA-Seq data processing**

RNA-Seq data were sequenced from multiple tissues (i.e., leaves, roots, and immature panicles) in 16 accessions. The RNA-Seq data was mapped to respective genomes using HISAT2 (v2.1.0) (Kim et al., 2019) with default parameters. The gene expression was calculated from the alignment results using StringTie (v1.3.4d) (Pertea et al., 2015).

### **Annotation reconstruction**

Gene annotations were reconstructed by *de novo* annotation and transcripts from Iso-Seq data. Based on the *de novo* annotation, we identify the new genes and transcripts from Iso-Seq data by comparing them in each variety using SQANTI3 (Tardaguila et al., 2018). Based on the *de novo* annotation gene ID, we inserted the new genes and transcripts to *de novo* annotations by gene locations using python scripts.

### **Homologs identification**

Homologs were identified using reconstructed annotations. Proteins translated by the longest transcript in gene were used to identify homologs. Then, GeneTribe (Chen et al., 2020) was used to perform the homology inference, which combined sequence similarity and collinearity block information, and generated homology relationships including “reciprocal best hits” (RBHs), “single-side best hits” (SBHs), one-to-many, and singletons.

### **Ortholog Gene Index establishment**

First, we removed redundant of the homologous gene groups across 18 annotations to obtain 119,783 non-redundant homologous gene groups. Furthermore, using the above data, homologous gene groups were clustered with the connected graph algorithm to obtain 112,658 Ortholog Gene Indices. Furthermore, using the above data, homologous gene groups were clustered with the connected graph algorithm (McColl et al., 1986) to obtain 112,658 Ortholog Gene Indices. If two gene groups have overlapped genes, they will be clustered to a new gene group by removing the redundant homologous genes. And we iterated the step until there were no connected homologous relationships found between any groups. The indices were then named with the following rules: the first two digits are the chromosome number containing the most genes in each OGI, and the last six digits represent the order of genes on the genome (Using the order of genes in MH63 as a reference to determine the basic order of OGI, and for OGI not containing MH63 gene, query the position of MH63 gene in the OGI where its upstream

gene is located, make insertion, and finally rearrange the order at intervals of 10.). For each OGI, a score was calculated and assigned with the number of involved accessions in each OGI divided by the total number of all accessions, and will be updated as the data increases.

### **Gene ages identification**

Gene ages were identified by previous methods (Wang *et al.*, 2018). We downloaded the NR database (<https://ftp.ncbi.nlm.nih.gov/blast/db/FASTA/>) from NCBI (13 October 2020) and classified the protein sequence to 13 taxonomic levels (PS1 [Cellular organisms]; PS2 [Eukaryota]; PS3 [Viridiplantae]; PS4 [Streptophyta, Streptophytina]; PS5 [Embryophyta]; PS6 [Tracheophyta, Euphyllophyta]; PS7 [Spermatophyta]; PS8 [Magnoliophyta, Mesangiospermae]; PS9 [Liliopsida, Petrosaviidae, Commelinids, Poales]; PS10 [Poaceae]; PS11 [BOP clade]; PS12 [Oryzoideae, Oryzeae, Oryza]; and PS13 [Oryza.sativa]) based on NCBI taxonomy. OGI core gene set and specific gene set were translated into proteins and were aligned to the 13 databases using BLASTP (2.11.0+) (Camacho *et al.*, 2009) with E-value < 1e-5 and identity > 30%. The age of a gene was considered as the taxonomic level of the oldest aligned protein.

### **Gene function annotation**

Proteins from annotation were mapped to the Swiss-Prot database with -evalue 1e-10 using BLAST (2.11.0+) (Camacho *et al.*, 2009). The relationships between genes and Gene Ontology (GO) terms were extracted from the BLAST result by python scripts. We annotated the pan gene sets by InterProScan (v5.55-88.0) (Jones *et al.*, 2014) with -dp -f tsv, and screened by evalue < 1E-10.

### **Alternative splicing events identification**

SUPPA2 (2.3) (Trincado *et al.*, 2018) was used to identify AS events for all transcripts, transcripts from Iso-Seq data and transcripts from various tissues (i.e., leaves, roots, and panicles). The AS events were classified into various types such as intron retention, exon skipping, alternative donor site, alternative acceptor site, and alternative position.

### **Phylogenetic analysis**

We first performed the multiple sequence alignment in homolog groups (longest protein of each gene) by mafft (7.475) (Kato and Standley, 2013) with `-auto -treeout -maxiterate 1000 -thread 8 -quiet -inputorder`. Second, the result were trimmed by trimAl (1.4.1) (Capella-Gutiérrez et al., 2009) with `-automated1`. Finally, we used IQ-TREE (1.6.12) (Nguyen et al., 2014) to generate the phylogenetic tree with default parameters and show the tree by ggtree (Yu et al., 2017). By default, the “TreePlot” tool extracts all pairwise homolog scores calculated by GeneTribe (Chen et al., 2020) in RGI, and then uses the MCL algorithm (van Dongen, 2000) to separate genes into different homologous groups. An option is provided to users to determine whether homologs in each group should be analyzed independently, or all genes together.

### **Other integrated Tools**

The “BLAST” tool was based on Sequenceserver (Priyam et al., 2019), and the “JBrowse” was adapted from Buels, et al (2016).

### **Data availability**

The datasets generated during and/or analyzed during the current study are available in <https://riceome.hzau.edu.cn>. PacBio Iso-Seq raw data are available from NCBI under BioProject PRJNA760839. The RNA-Seq raw data are available from NCBI under BioProject PRJNA659864 and PRJNA597070.

# Supplemental Figures

**A**

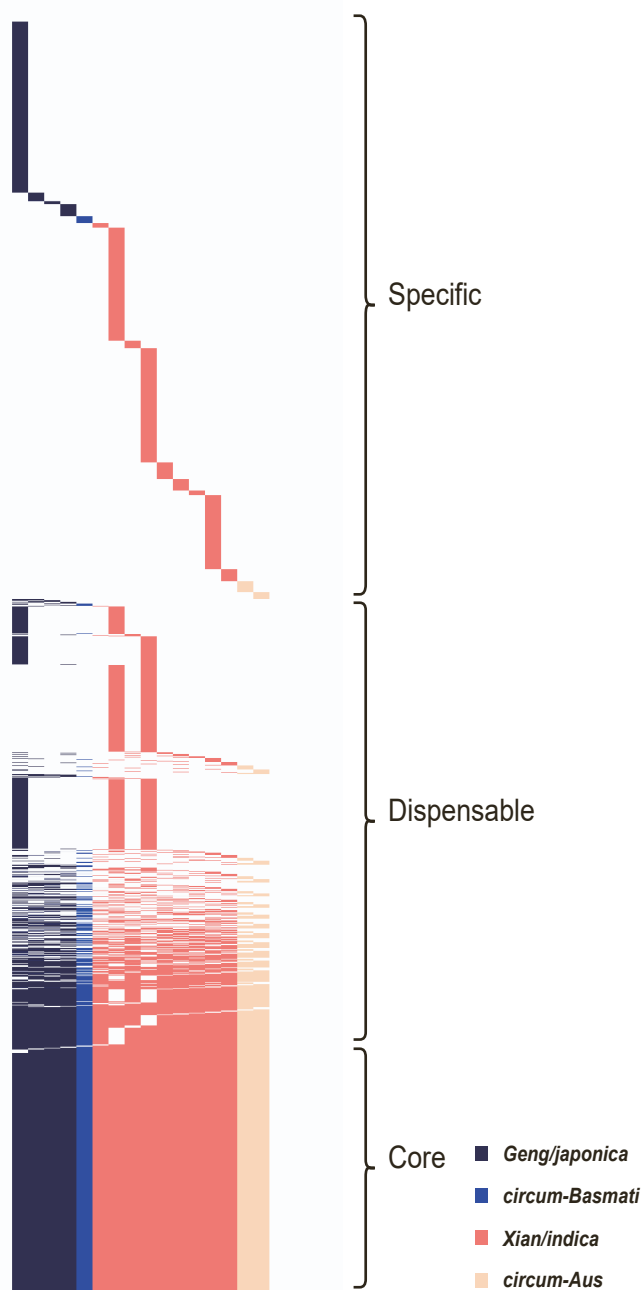

**B**

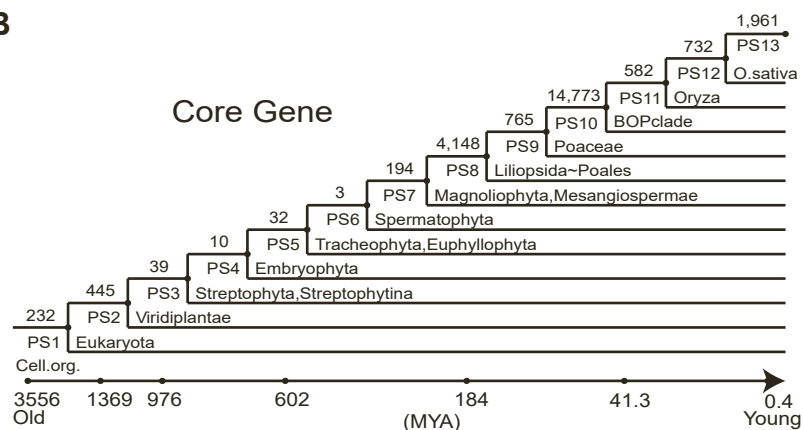

**C**

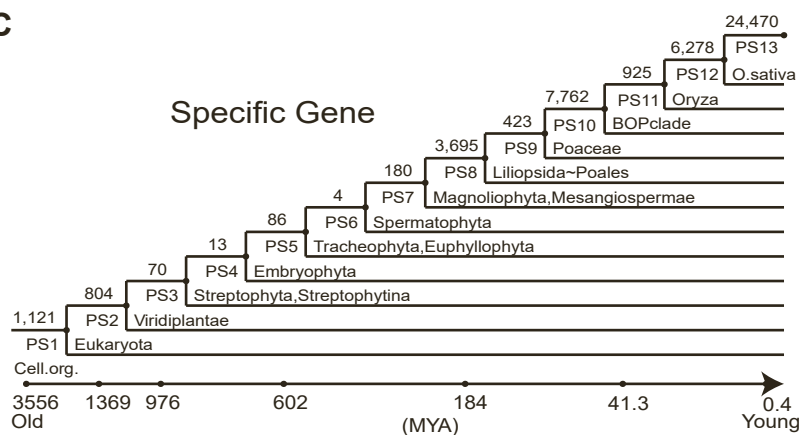

**D**

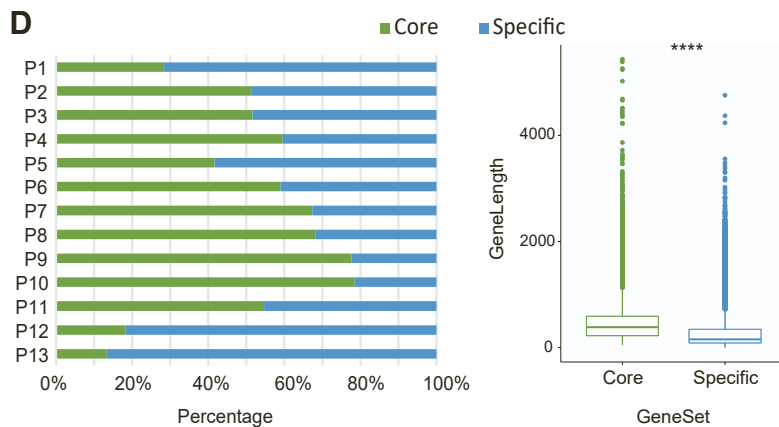

**Supplemental Figure 1.** Gene presence/absence variations in 16 Asian rice accessions. (A) The core genes are present in all accessions, the dispensable genes are present in <16 of accessions, and the accession-specific genes are only present in one accession. The presence of genes is colorful (4 subpopulations in Asian rice: *Geng/japonica*, *Xian/indica*, *circum-Aus*, and *circum-Basmati*), and the absence of genes is white. (B and C) The numbers of core genes (B) and accession-specific genes (C) that emerged at different evolutionary times, from PS1 (single-cell organisms) to PS13 (*O. sativa*). (D) The age distribution (left) and gene length (right) of the core and genes. (See Methods)

|                                                            | Os GJ-temp: Nipponbare   IRGSP 1.0   MSU | Os GJ-temp: Nipponbare   IRGSP 1.0   RAPdb | Os GJ-temp: Nipponbare   IRGSP 1.0   Gramene(+IsoSeq) | Os GJ-subtrp: CHAO MEO   Os132278RS1   Gramene(+IsoSeq) | Os GJ-trop1: Azucena   AzucenaRS1   Gramene(+IsoSeq) | Os GJ-trop2: KETAN NANGKA   Os128077RS1   Gramene(+IsoSeq) | Os cB: ARC 10497   Os117425RS1   Gramene(+IsoSeq) | Os XI-1B2: PR 106   Os127742RS1   Gramene(+IsoSeq) | Os XI-adm: Minghui 63   MH63RS3   HZAU | Os XI-1B1: IR 64   OsIR64RS1   Gramene(+IsoSeq) | Os XI-1A: Zhenshan 97   ZS97RS3   HZAU | Os XI-3A: LIMA   Os127564RS1   Gramene(+IsoSeq) | Os XI-3B1: KHAO YAI GUANG   Os127518RS1   Gramene(+IsoSeq) | Os XI-2A: GOBOL SAIL   Os132424RS1   Gramene(+IsoSeq) | Os XI-3B2: LIU XU   Os125827RS1   Gramene(+IsoSeq) | Os XI-2B: LARHA MUGAD   Os125619RS1   Gramene(+IsoSeq) | Os cA1: N22   OsN22RS2   Gramene(+IsoSeq) | Os cA2: NATEL BORO   Os127652RS1   Gramene(+IsoSeq) |
|------------------------------------------------------------|------------------------------------------|--------------------------------------------|-------------------------------------------------------|---------------------------------------------------------|------------------------------------------------------|------------------------------------------------------------|---------------------------------------------------|----------------------------------------------------|----------------------------------------|-------------------------------------------------|----------------------------------------|-------------------------------------------------|------------------------------------------------------------|-------------------------------------------------------|----------------------------------------------------|--------------------------------------------------------|-------------------------------------------|-----------------------------------------------------|
| Os GJ-temp: Nipponbare   IRGSP 1.0   MSU                   | -                                        | 28365                                      | 28169                                                 | 32747                                                   | 32703                                                | 32678                                                      | 32354                                             | 32121                                              | 47376                                  | 31789                                           | 49471                                  | 32849                                           | 32318                                                      | 32118                                                 | 38300                                              | 32139                                                  | 32139                                     | 31858                                               |
| Os GJ-temp: Nipponbare   IRGSP 1.0   RAPdb                 | 32576                                    | -                                          | 35396                                                 | 28760                                                   | 28730                                                | 28820                                                      | 28523                                             | 28665                                              | 29786                                  | 28326                                           | 30393                                  | 29211                                           | 28879                                                      | 28639                                                 | 33808                                              | 28632                                                  | 28595                                     | 28462                                               |
| Os GJ-temp: Nipponbare   IRGSP 1.0   Gramene(+IsoSeq)      | 32598                                    | 35493                                      | -                                                     | 28773                                                   | 28724                                                | 28839                                                      | 28572                                             | 28563                                              | 29691                                  | 28287                                           | 30336                                  | 29127                                           | 28792                                                      | 28521                                                 | 33747                                              | 28573                                                  | 28552                                     | 28399                                               |
| Os GJ-subtrp: CHAO MEO   Os132278RS1   Gramene(+IsoSeq)    | 34911                                    | 28552                                      | 28396                                                 | -                                                       | 35441                                                | 35287                                                      | 34813                                             | 34106                                              | 31273                                  | 33680                                           | 31991                                  | 34811                                           | 34300                                                      | 34015                                                 | 40535                                              | 34072                                                  | 34121                                     | 33727                                               |
| Os GJ-trop1: Azucena   AzucenaRS1   Gramene(+IsoSeq)       | 34915                                    | 28534                                      | 28390                                                 | 35447                                                   | -                                                    | 35421                                                      | 34869                                             | 34220                                              | 31330                                  | 33747                                           | 32018                                  | 34921                                           | 34319                                                      | 34087                                                 | 40717                                              | 34143                                                  | 34199                                     | 33875                                               |
| Os GJ-trop2: KETAN NANGKA   Os128077RS1   Gramene(+IsoSeq) | 35565                                    | 28522                                      | 28410                                                 | 35224                                                   | 35359                                                | -                                                          | 35002                                             | 34225                                              | 32020                                  | 33950                                           | 32636                                  | 34980                                           | 34399                                                      | 34076                                                 | 40793                                              | 34253                                                  | 34329                                     | 33828                                               |
| Os cB: ARC 10497   Os117425RS1   Gramene(+IsoSeq)          | 34440                                    | 28374                                      | 28285                                                 | 34813                                                   | 34877                                                | 35075                                                      | -                                                 | 34156                                              | 31195                                  | 33954                                           | 31863                                  | 34971                                           | 34335                                                      | 34022                                                 | 40739                                              | 34252                                                  | 34400                                     | 33829                                               |
| Os XI-1B2: PR 106   Os127742RS1   Gramene(+IsoSeq)         | 34296                                    | 28360                                      | 28160                                                 | 33989                                                   | 34111                                                | 34190                                                      | 34035                                             | -                                                  | 31787                                  | 34672                                           | 32299                                  | 35342                                           | 35013                                                      | 34757                                                 | 41352                                              | 34606                                                  | 34277                                     | 33850                                               |
| Os XI-adm: Minghui 63   MH63RS3   HZAU                     | 48304                                    | 27546                                      | 27342                                                 | 31531                                                   | 31592                                                | 31666                                                      | 31459                                             | 31934                                              | -                                      | 31581                                           | 54830                                  | 32475                                           | 31995                                                      | 31815                                                 | 37886                                              | 31671                                                  | 31632                                     | 31383                                               |
| Os XI-1B1: IR 64   OsIR64RS1   Gramene(+IsoSeq)            | 34077                                    | 28141                                      | 28000                                                 | 33696                                                   | 33758                                                | 34040                                                      | 33966                                             | 34797                                              | 31673                                  | -                                               | 32164                                  | 35247                                           | 34873                                                      | 34557                                                 | 41177                                              | 34465                                                  | 34254                                     | 33658                                               |
| Os XI-1A: Zhenshan 97   ZS97RS3   HZAU                     | 48497                                    | 27855                                      | 27665                                                 | 31751                                                   | 31810                                                | 31901                                                      | 31650                                             | 32044                                              | 52951                                  | 31712                                           | -                                      | 32602                                           | 32136                                                      | 31891                                                 | 38134                                              | 31856                                                  | 31854                                     | 31585                                               |
| Os XI-3A: LIMA   Os127564RS1   Gramene(+IsoSeq)            | 34186                                    | 28375                                      | 28186                                                 | 34004                                                   | 34103                                                | 34248                                                      | 34127                                             | 34669                                              | 31610                                  | 34435                                           | 32106                                  | -                                               | 35182                                                      | 34816                                                 | 41504                                              | 34657                                                  | 34264                                     | 33871                                               |
| Os XI-3B1: KHAO YAI GUANG   Os127518RS1   Gramene(+IsoSeq) | 34071                                    | 28399                                      | 28213                                                 | 34007                                                   | 33999                                                | 34168                                                      | 34037                                             | 34800                                              | 31478                                  | 34557                                           | 32041                                  | 35718                                           | -                                                          | 34867                                                 | 41504                                              | 34686                                                  | 34329                                     | 33849                                               |
| Os XI-2A: GOBOL SAIL   Os132424RS1   Gramene(+IsoSeq)      | 33982                                    | 28385                                      | 28168                                                 | 33887                                                   | 33968                                                | 34006                                                      | 33887                                             | 34724                                              | 31411                                  | 34394                                           | 31913                                  | 35495                                           | 35029                                                      | -                                                     | 41318                                              | 34583                                                  | 34281                                     | 33997                                               |
| Os XI-3B2: LIU XU   Os125827RS1   Gramene(+IsoSeq)         | 34362                                    | 28517                                      | 28346                                                 | 34181                                                   | 34290                                                | 34451                                                      | 34357                                             | 34887                                              | 31709                                  | 34654                                           | 32239                                  | 35728                                           | 35217                                                      | 34890                                                 | -                                                  | 34767                                                  | 34589                                     | 34013                                               |
| Os XI-2B: LARHA MUGAD   Os125619RS1   Gramene(+IsoSeq)     | 34159                                    | 28333                                      | 28166                                                 | 33985                                                   | 34026                                                | 34221                                                      | 34149                                             | 34628                                              | 31377                                  | 34353                                           | 31955                                  | 35372                                           | 34890                                                      | 34597                                                 | 41120                                              | -                                                      | 34363                                     | 33988                                               |
| Os cA1: N22   OsN22RS2   Gramene(+IsoSeq)                  | 34442                                    | 28425                                      | 28290                                                 | 34059                                                   | 34172                                                | 34353                                                      | 34362                                             | 34359                                              | 31536                                  | 34192                                           | 32188                                  | 35002                                           | 34575                                                      | 34347                                                 | 41010                                              | 34411                                                  | -                                         | 34592                                               |
| Os cA2: NATEL BORO   Os127652RS1   Gramene(+IsoSeq)        | 34053                                    | 28365                                      | 28190                                                 | 33779                                                   | 33978                                                | 33974                                                      | 33934                                             | 34067                                              | 31239                                  | 33727                                           | 31788                                  | 34728                                           | 34230                                                      | 34220                                                 | 40557                                              | 34140                                                  | 34713                                     | -                                                   |

**Supplemental Figure 2.** The 18 x 18 gene annotation matrix, which shows the number of 1-to-1 homologs, and demonstrates the homologous gene pairs. The color corresponds to the number of homologs. Red represents higher gene pairs number and blue represents lower gene pairs number.



A

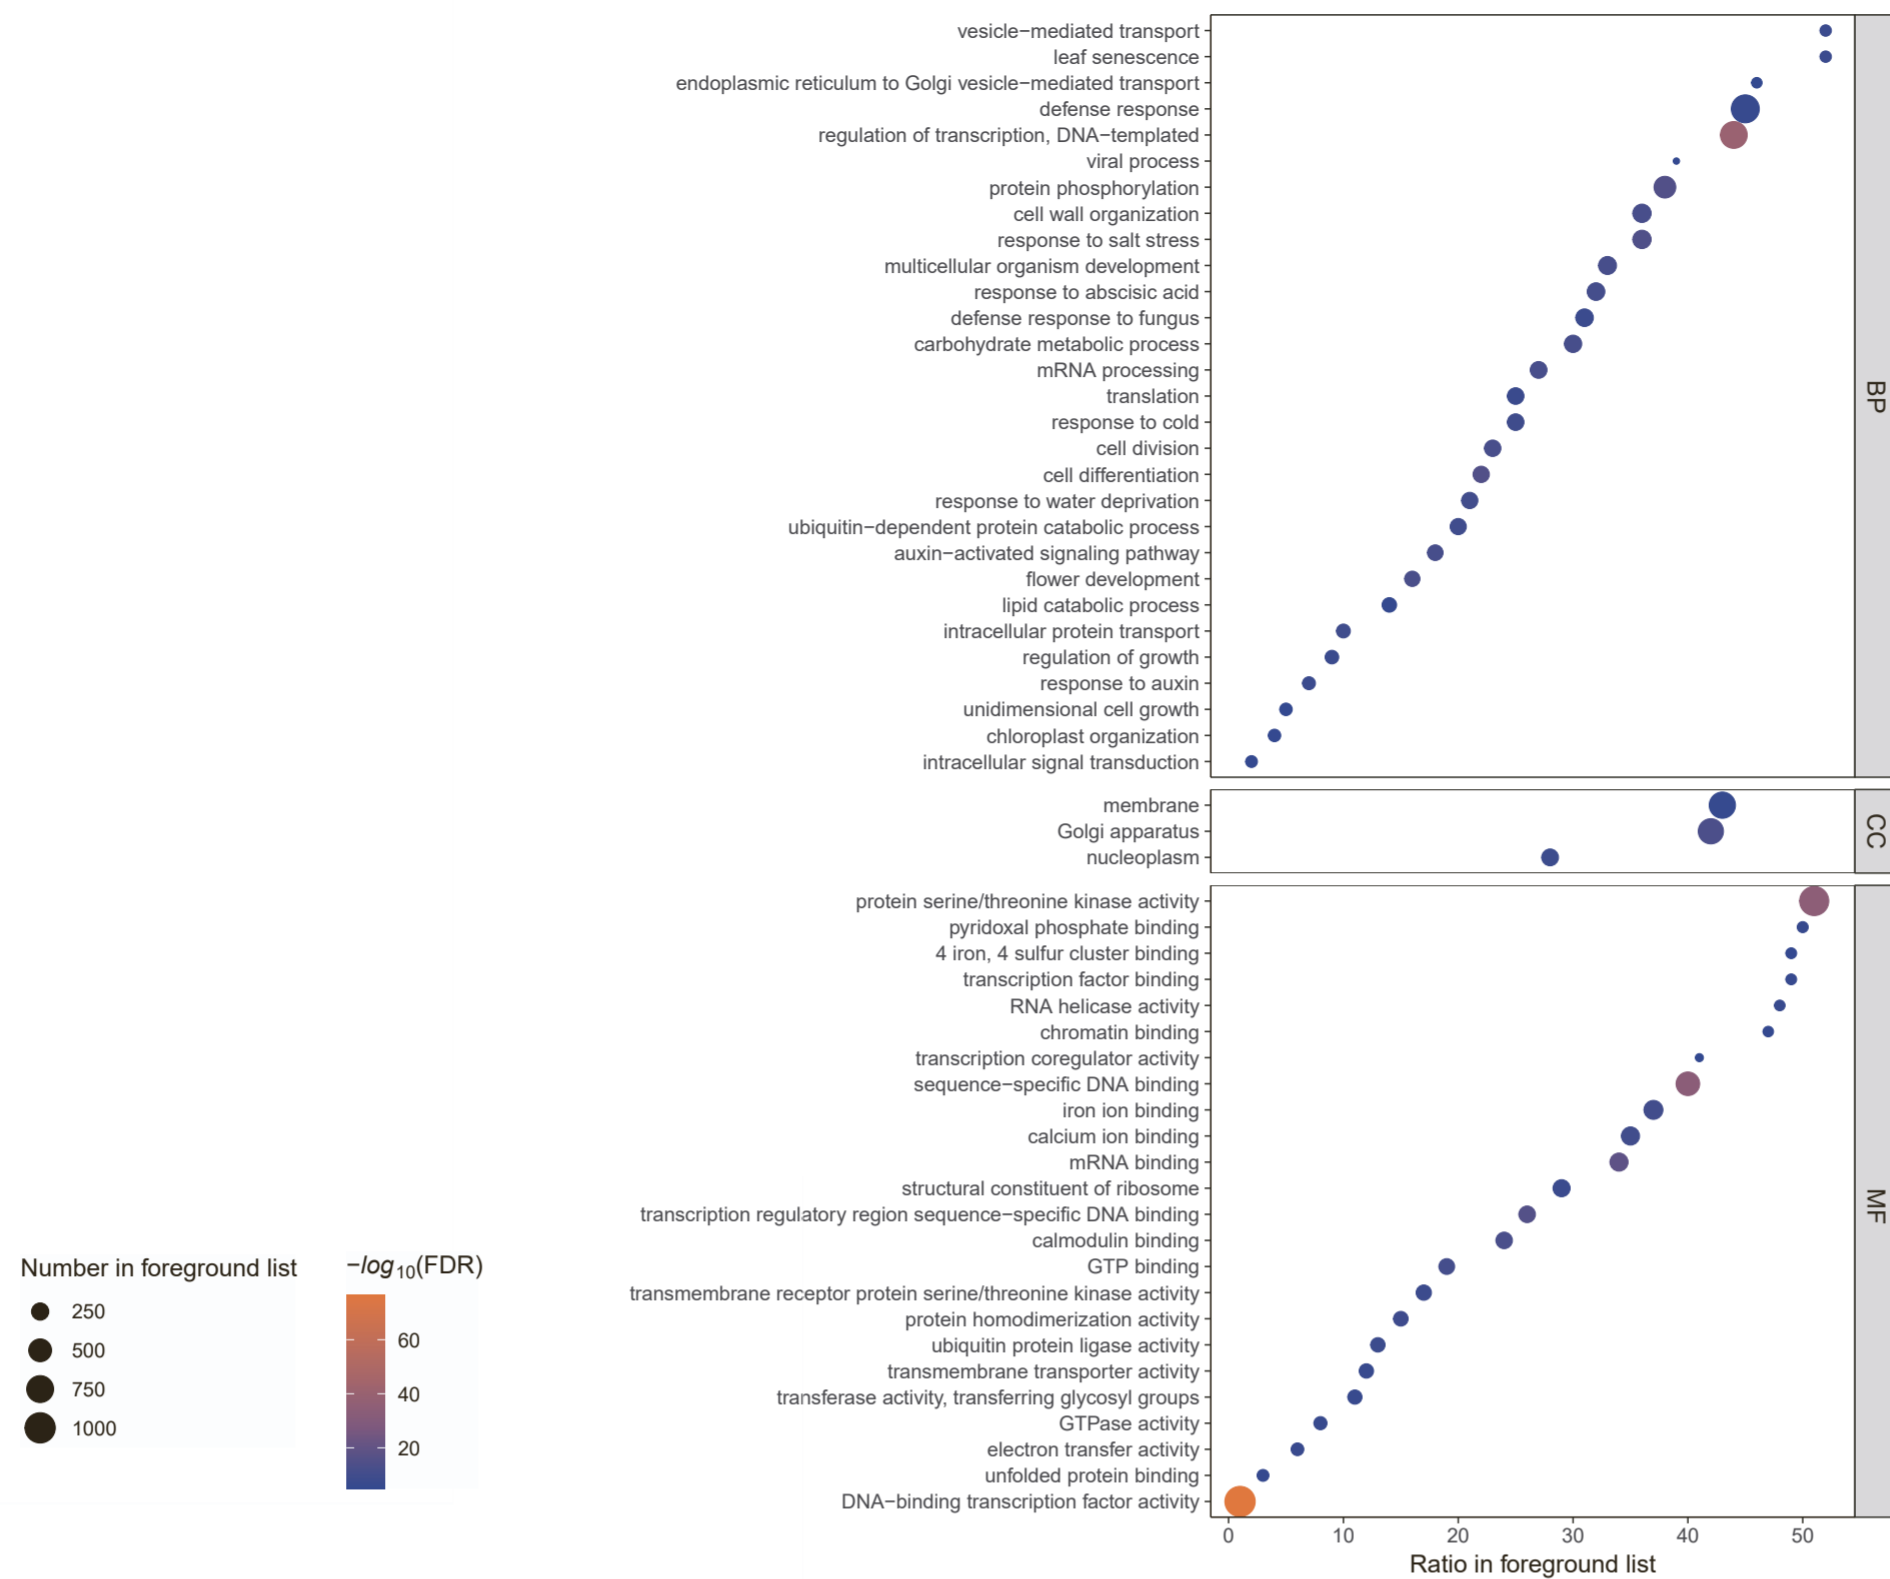

B

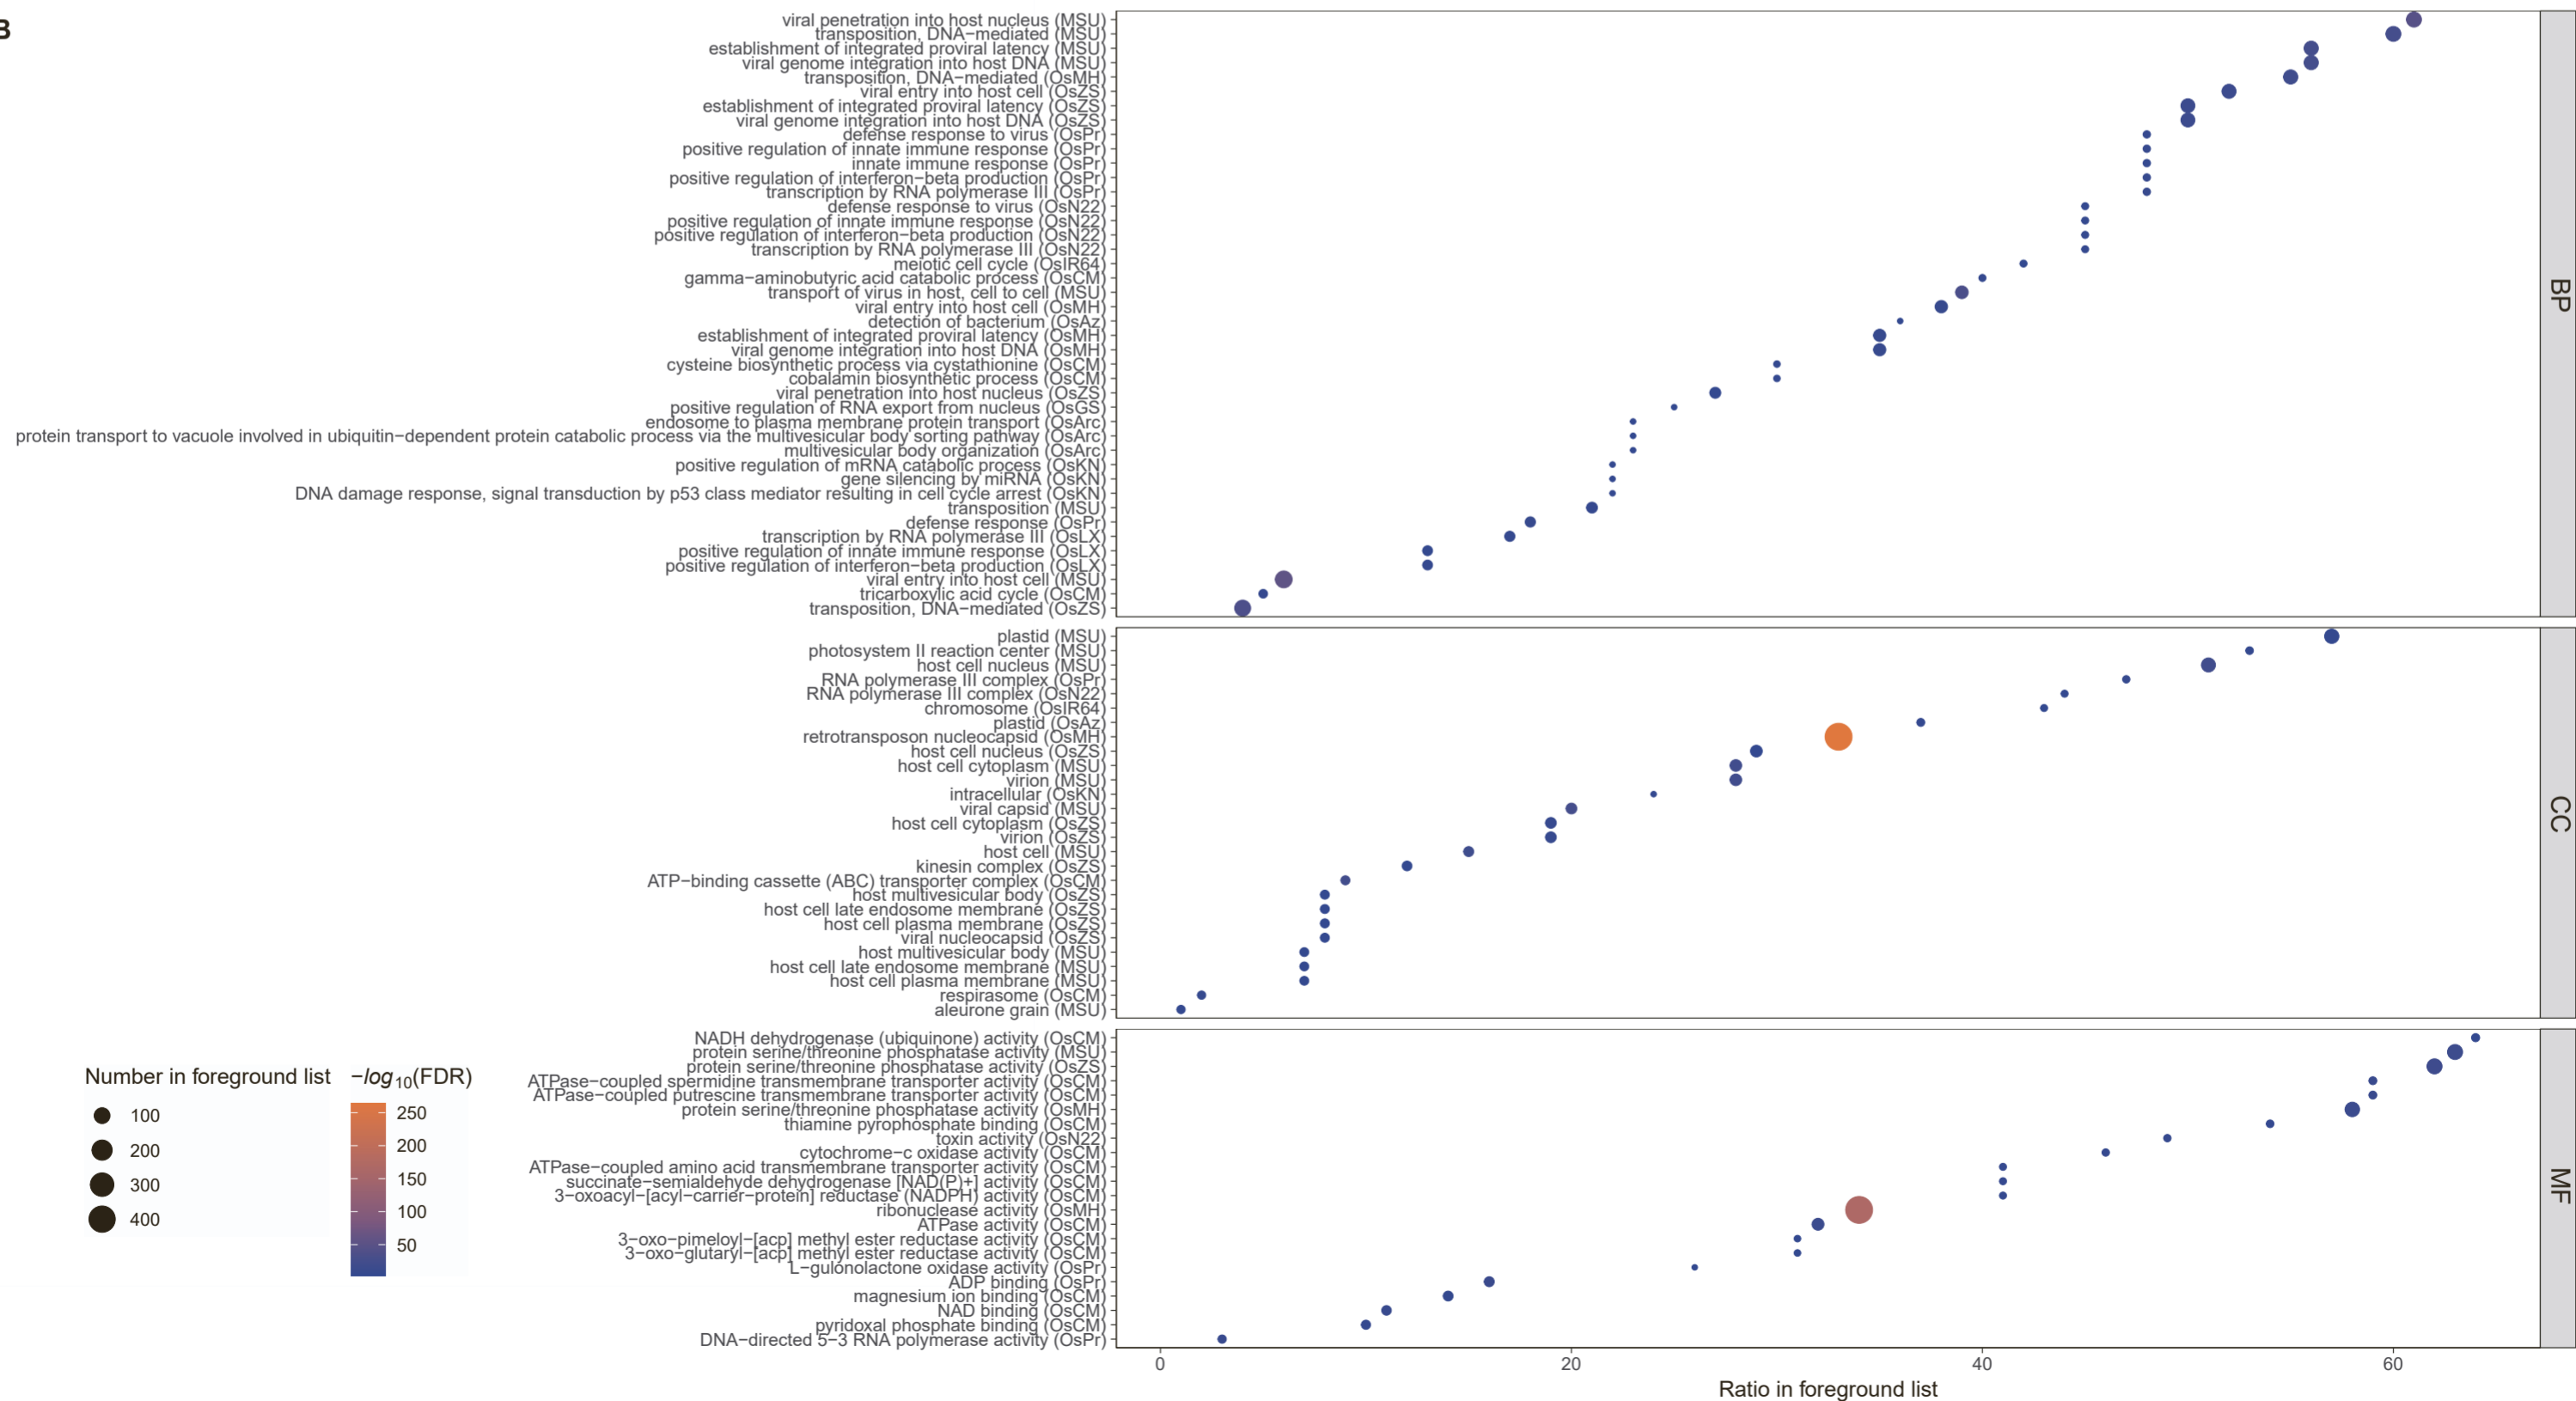

**Supplemental Figure 3.** The bubble plot of the Gene Ontology enrichment analysis in (A) the core gene set and (B) the accession-specific gene set.

A

## Basic Info

Search in RGI

Search

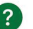

| Gene ID            | OGI #   Score <span>?</span>                                                                                                                                                                                                                                                                                                                                                                                                                                                                                                                                                                                                                                      | Accession   Assembly   Annotation         | Location                | Links                                                                                          |
|--------------------|-------------------------------------------------------------------------------------------------------------------------------------------------------------------------------------------------------------------------------------------------------------------------------------------------------------------------------------------------------------------------------------------------------------------------------------------------------------------------------------------------------------------------------------------------------------------------------------------------------------------------------------------------------------------|-------------------------------------------|-------------------------|------------------------------------------------------------------------------------------------|
| OsNip_01g0357100   | OGI:01044620   16/16                                                                                                                                                                                                                                                                                                                                                                                                                                                                                                                                                                                                                                              | Nipponbare   IRGSP 1.0   Gramene(+IsoSeq) | Chr01:14446913-14453454 | <a href="#">Homologues</a><br><a href="#">MicroCollinearity</a><br><a href="#">RGI-JBrowse</a> |
| <b>Gene Symbol</b> | PSR1, PSR1, NiR, OsNiR, OsNIR1, NIR1, FD-NiR, OsNiR2                                                                                                                                                                                                                                                                                                                                                                                                                                                                                                                                                                                                              |                                           |                         |                                                                                                |
| <b>DNA seq</b>     | GAACCTTATCTCCTTCTCTCTCGTCGTTTCTGCGTCTCCCGTCTCTCTCTCGCAACAGCCGAGAAGAGGAGAGAGAGCGCCGCCCGTCCCTCTCTCTCC<br>TCTCGTCTCGCCCATCCCTCTCGTCTTCCCTTCCCGGAGCAGAGGAGGCGGAGCGAGCGCTTACAGTGTCCACGGGCGGATCGGGCAGTGGCGG...<br>More                                                                                                                                                                                                                                                                                                                                                                                                                                                  |                                           |                         |                                                                                                |
| <b>CDS seq</b>     | ATGGCCTCTCCGCTCCCTGCAGCGTCTCTCCCGGTACCCCAACGCGGAGCATCCCGTCCCGCTCCCGGCTCCCGCGCCCGCCCGTGCAGTGTCTG<br>ACGGTGTCCGACCGTCTCTCTCGATCCCGGCGGAGCAGGCGGTGTGCGGAGCGGCTGGAGCCGCGGTGGAGCAGCGGAGGCGCGGTACTGGGT...<br>More                                                                                                                                                                                                                                                                                                                                                                                                                                                       |                                           |                         |                                                                                                |
| <b>Protein seq</b> | MASSASLQRFLLPPYHAAASRCRPPGVRARPVQSSVTSAPSSSTPAADEAVSAERLEPRVEQREGRYWVWVLEKYRTGLNPQEKVKGKPEMSLFMEGGIKELAKMPM<br>EEIEADKLSKEDIDVRLKWLGLFHRKHKQYGRFMMRLKLPNGVTTSEQTRYLASVIEAYGKEGCADVTTRQNWQIRGVTLDPVPAILDGLNAVGLTSLQSGMDNVRN<br>PVGNPLAGIDPDEIVDTRSYTNLLSSYITSNFQGNPTITNLPRKWNVCVIGSHDLYEHPHINDLAYMPAVKGGKFGFNLLVGGFISPKRWEEALPLDAWVPGDDIIPVC<br>KAVLEAYRDLGTRGNRQKTRMMWLIDELVNHFFLHSSPTLTELMSQCSYQLIAVLALQGMFAFRSEVEKRMPPNGVLERAAPEDLIDKWKQRRDYLGVHPQKQEG<br>MSYVGLHVPVGRVQAADMFLARLADYEGSGELRLTVEQNIVIPNVKNEKVEALLSEPLLQKFSQPSSLKGLVACTGNQFCGQAIETKQRALLVTSQVEKLVSPRA<br>VRMHWTGCPNCSGQVQVADIGFMGCLTKDSAGKIVEAADIFVGGGRVGSDSLHLAGAYKKSVPCELAIVADILVERFGAVRREREDEE |                                           |                         |                                                                                                |
| <b>Function</b>    | Ferredoxin--nitrite reductase, chloroplastic [UniProtKB/Swiss-Prot:Q42997]                                                                                                                                                                                                                                                                                                                                                                                                                                                                                                                                                                                        |                                           |                         |                                                                                                |

B

## Transcripts

Transcripts browser

Transcripts table

Alternative Splicing events browser

Alternative Splicing events table

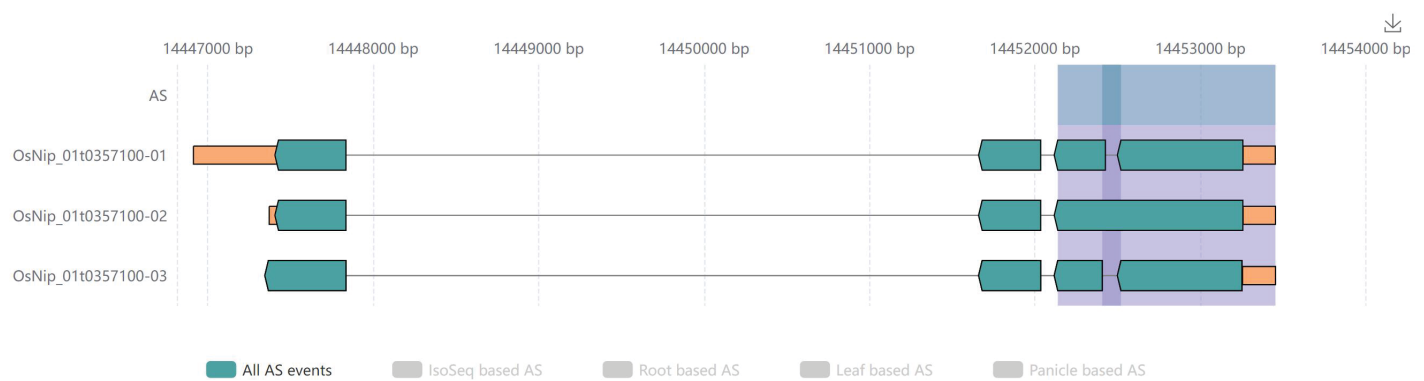

## Expression

Browser

Table

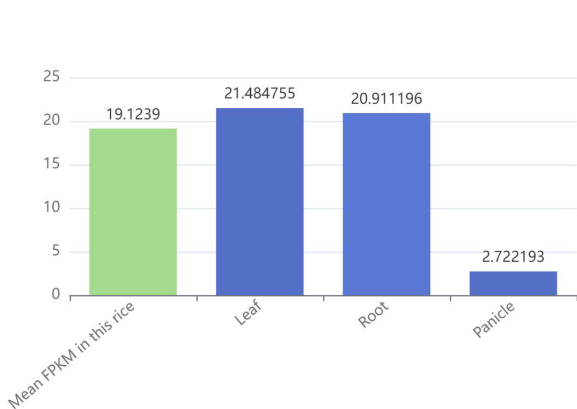

C

## Homologues

Browser

Table

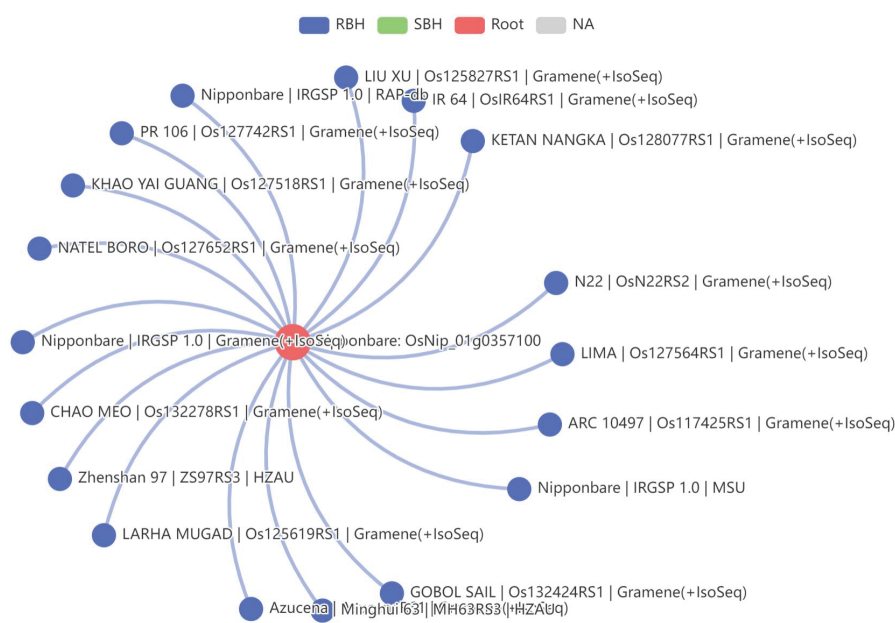

TreePlot

Custom TreePlot

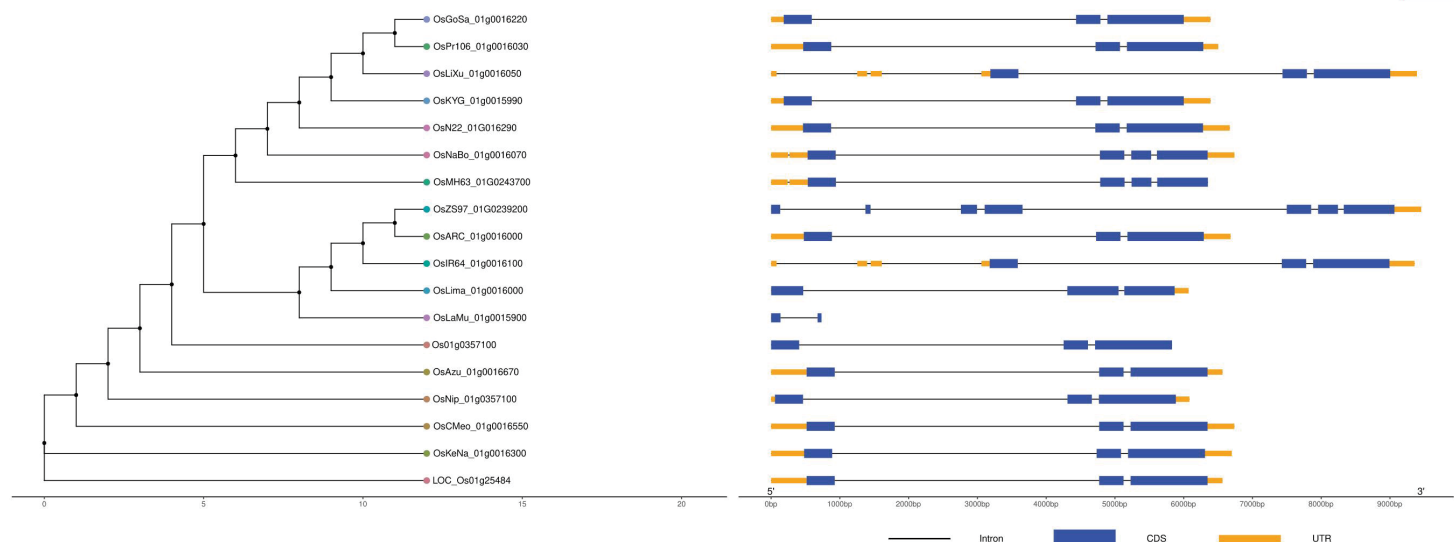

**Supplemental Figure 4.** The “GeneCard” page. (A) Basic information. (B) Transcriptome information. (C) Homologues information.

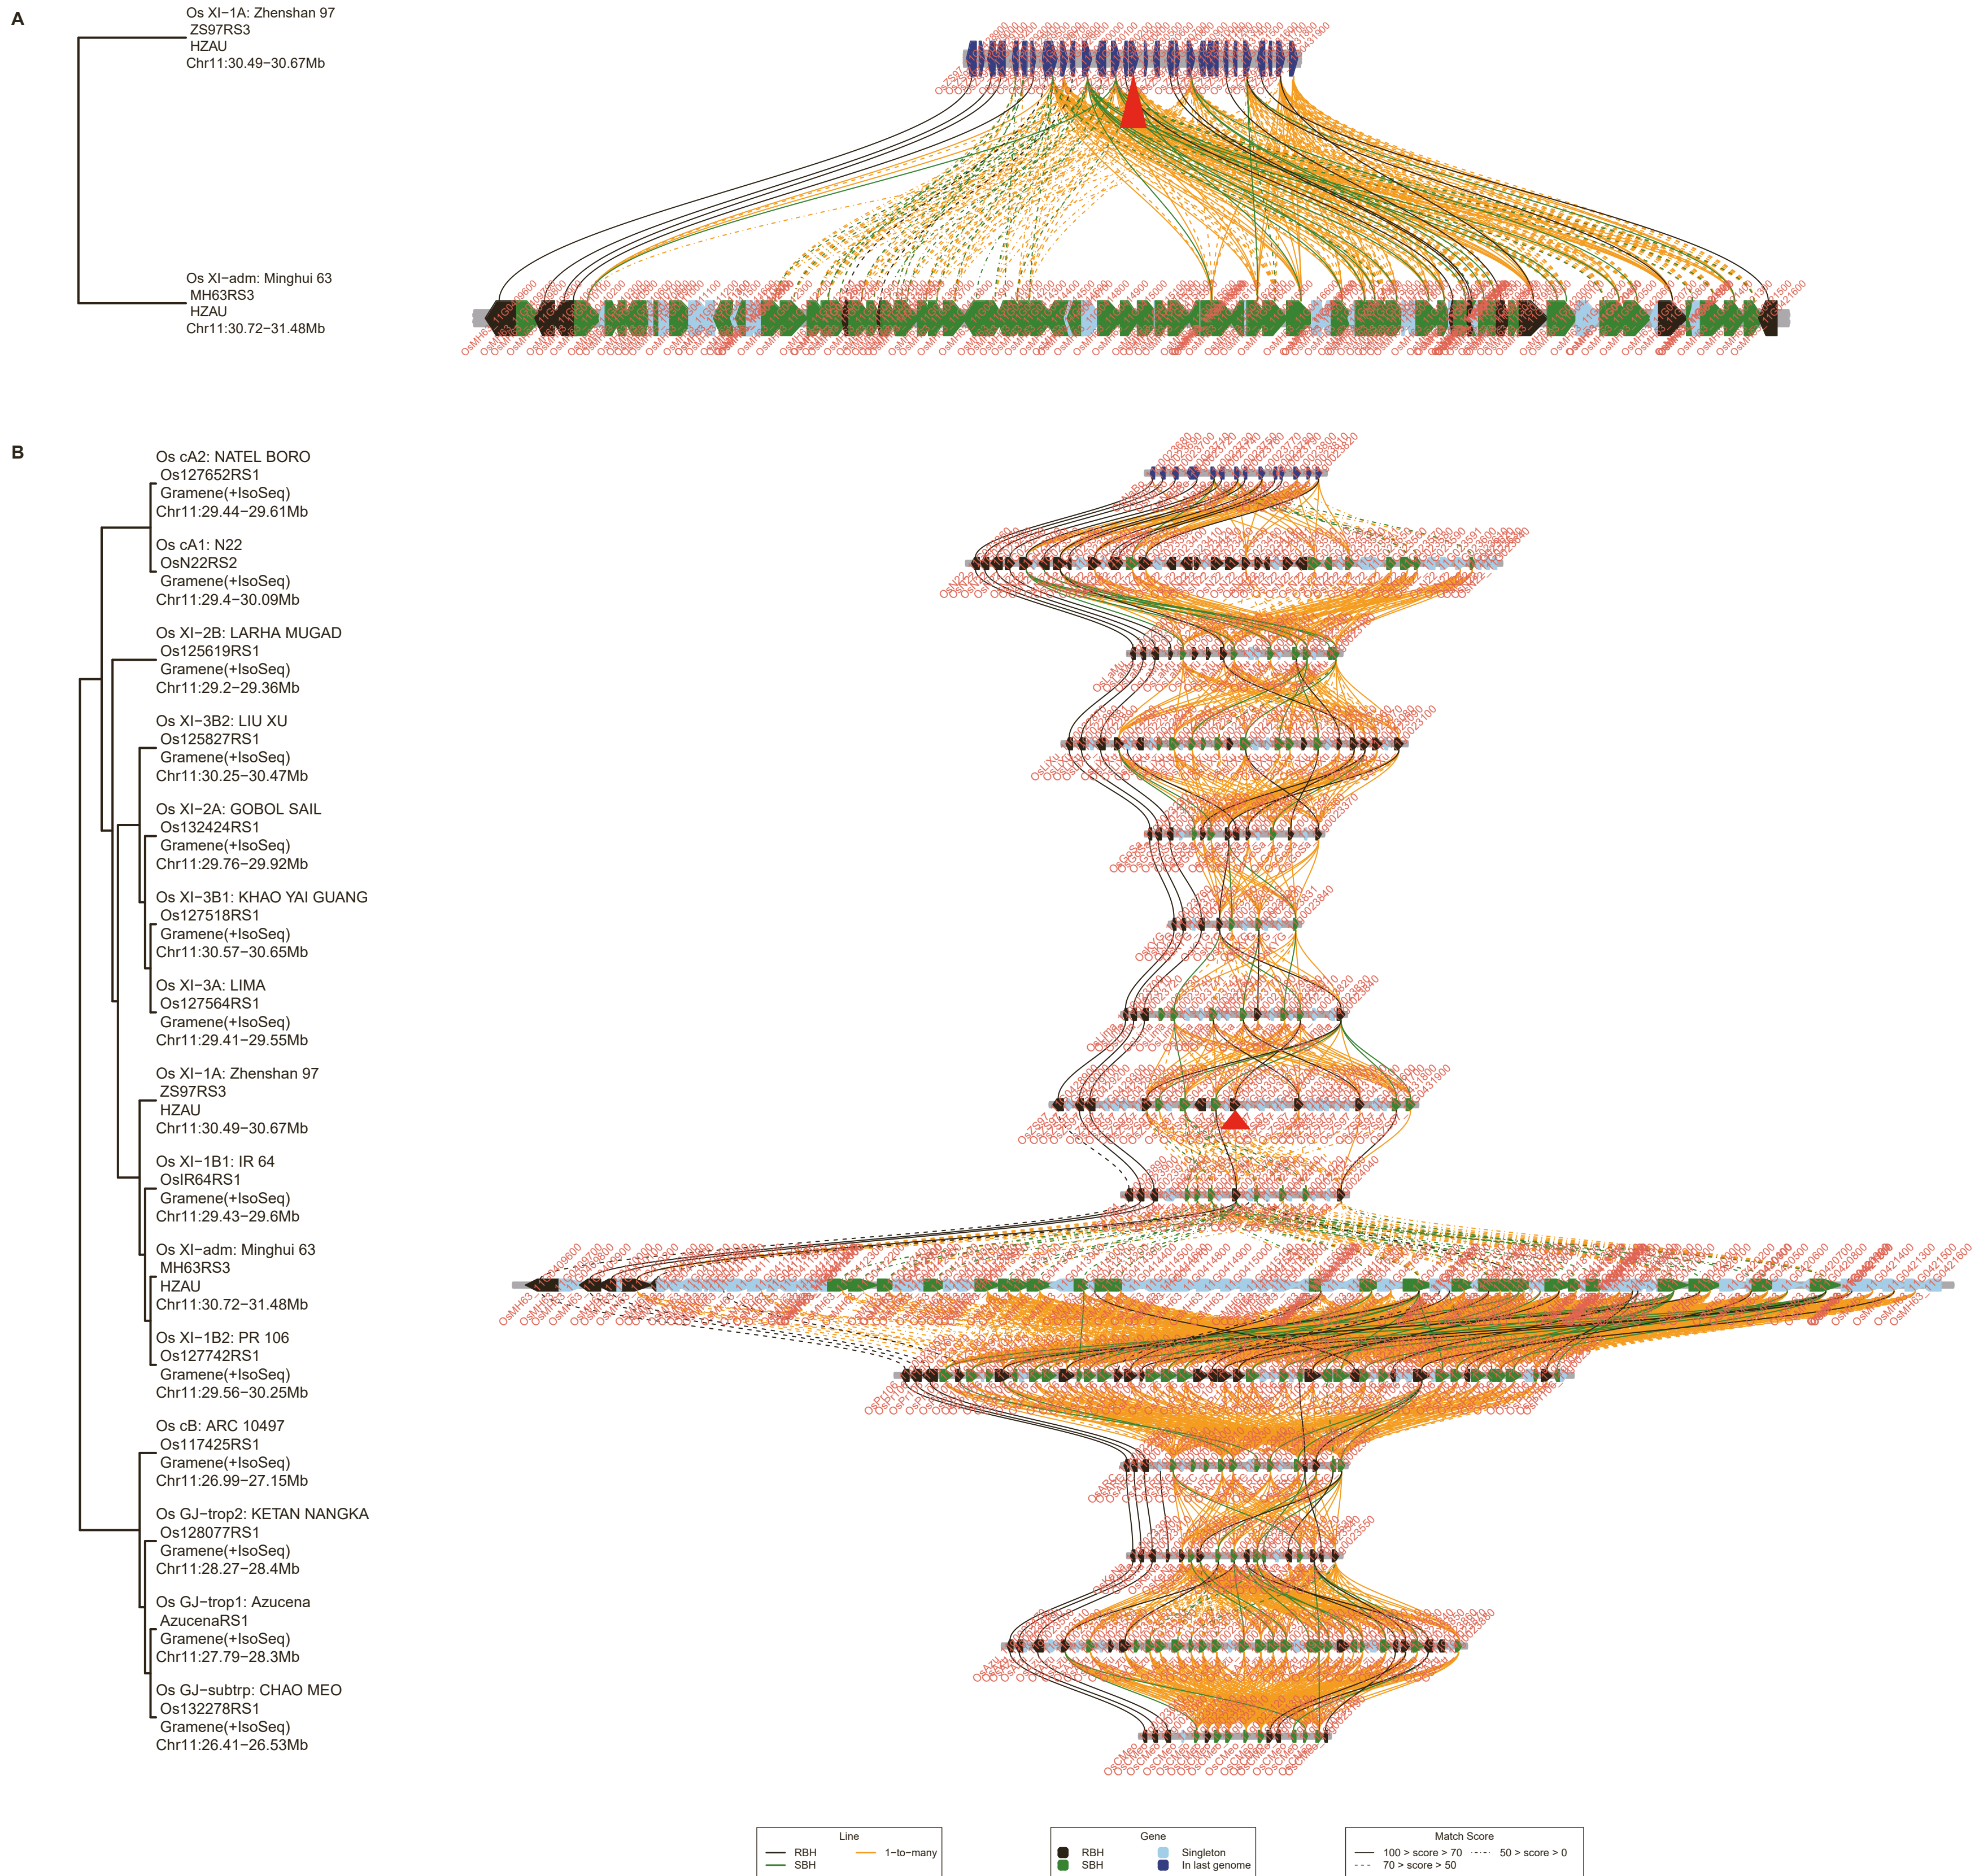

**Supplemental Figure 5.** In previous studies, nucleotide-binding site leucine-rich repeat (NLR) genes were found to be highly duplicated in chromosome 11 of MH63 compared with other genomes. (A) displays the micro-collinearity of NLR genes in MH63 and ZS97 by searching NLR gene OsZS97\_11G0430400 in the “MicroCollinearity” module. (B) displays the micro-collinearity of NLR genes in 16 varieties by searching NLR gene OsZS97\_11G0430400 in the “MicroCollinearity” module. (A) and (B) show OsZS97\_11G0430400’s 15 flanking genes.

## Supplemental Tables

**Supplemental Table 1.** Summary of RGI data composition.

| Accession Name               | Subpopulations       | Assembly    | Annotation <sup>a</sup> | Locus Tag Prefix |
|------------------------------|----------------------|-------------|-------------------------|------------------|
|                              |                      |             | Gramene (+IsoSeq)       | OsNip_           |
| Os GJ-temp: Nipponbare       | Geng-japonica-temp   | IRGSP1.0    | MSU                     | LOC_Os           |
|                              |                      |             | RAP-db                  | Os               |
| Os GJ-subtrp: CHAO MEO       | Geng-japonica-trop1  | AzucenaRS1  | Gramene (+IsoSeq)       | OsAzu_           |
| Os GJ-trop1: Azucena         | Geng-japonica-trop2  | Os128077RS1 | Gramene (+IsoSeq)       | OsKeNa_          |
| Os GJ-trop2: KETAN<br>NANGKA | Geng-japonica-subtrp | Os132278RS1 | Gramene (+IsoSeq)       | OsCMeo_          |
| Os cB: ARC 10497             | circum-Basmati       | Os117425RS1 | Gramene (+IsoSeq)       | OsARC_           |
| Os XI-1B2: PR 106            | Xian-indica-1B2      | Os127742RS1 | Gramene (+IsoSeq)       | OsPr106_         |
| Os XI-adm: MH63              | Xian-indica-adm      | MH63RS3     | HZAU                    | OsMH63_          |
| Os XI-1B1: IR 64             | Xian-indica-1B1      | OsIR64RS1   | Gramene (+IsoSeq)       | OsIR64_          |
| Os XI-1A: ZS97               | Xian-indica-1A       | ZS97RS3     | HZAU                    | OsZS97_          |
| Os XI-3A: LIMA               | Xian-indica-3A       | Os127564RS1 | Gramene (+IsoSeq)       | OsLima_          |
| Os XI-3B1: KHAO YAI<br>GUANG | Xian-indica-3B1      | Os127518RS1 | Gramene (+IsoSeq)       | OsKYG_           |
| Os XI-2A: GOBOL SAIL         | Xian-indica-2A       | Os132424RS1 | Gramene (+IsoSeq)       | OsGoSa_          |
| Os XI-3B2: LIU XU            | Xian-indica-3B2      | Os125827RS1 | Gramene (+IsoSeq)       | OsLiXu_          |
| Os XI-2B: LARHA MUGAD        | Xian-indica-2B       | Os125619RS1 | Gramene (+IsoSeq)       | OsLaMu_          |
| Os cA1: N22                  | circum-Aus1          | OsN22RS2    | Gramene (+IsoSeq)       | OsN22_           |
| Os cA2: NATEL BORO           | circum-Aus2          | Os127652RS1 | Gramene (+IsoSeq)       | OsNaBo_          |

<sup>a</sup> this row is the annotation source, Gramene (+IsoSeq) means de novo annotation attached transcripts from Iso-Seq data

**Supplemental Table 2.** Iso-Seq and from multiple tissues (i.e., leaves, roots, and immature panicles) of 16 rice accessions.

| Accessions                | SMRT CELL <sup>a</sup> |         |      | HQ FLNC Reads |         |        | HQ Transcripts |         |        |        |
|---------------------------|------------------------|---------|------|---------------|---------|--------|----------------|---------|--------|--------|
|                           | Leaf                   | Panicle | Root | Leaf          | Panicle | Root   | Leaf           | Panicle | Root   | Merged |
| Os GJ-temp: Nipponbare    | 1                      | 1       | 1    | 19,101        | 26,760  | 34,261 | 14,751         | 20,883  | 27,415 | 40,644 |
| Os GJ-subtrp: CHAO MEO    | 1                      | 1       | 1    | 26,589        | 28,501  | 26,100 | 22,916         | 17,237  | 22,084 | 40,025 |
| Os GJ-trop1: Azucena      | 1                      | 1       | 1    | 29,209        | 33,939  | 32,440 | 24,908         | 25,060  | 23,557 | 45,578 |
| Os GJ-trop2: KETAN NANGKA | 1                      | 1       | 2    | 17,148        | 53,122  | 28,529 | 9,905          | 25,429  | 24,123 | 37,942 |
| Os cB: ARC 10497          | 1                      | -       | 1    | 25,932        |         | 25,265 | 19,225         | -       | 19,584 | 29,880 |
| Os XI-1B2: PR 106         | 1                      | 1       | 1    | 31,088        | 44,374  | 26,093 | 19,008         | 21,528  | 21,720 | 38,785 |
| Os XI-adm: MH63           | -                      | -       | -    | -             | -       | -      | -              | -       | -      | -      |
| Os XI-1B1: IR 64          | 1                      | 1       | 1    | 19,168        | 31,556  | 31,937 | 14,951         | 24,625  | 21,376 | 39,818 |
| Os XI-1A: ZS97            | -                      | -       | -    | -             | -       | -      | -              | -       | -      | -      |
| Os XI-3A: LIMA            | 1                      | -       | 1    | 32,067        | -       | 26,603 | 17,771         | -       | 14,487 | 23,989 |
| Os XI-3B1: KHAO YAI GUANG | 1                      | 1       | 1    | 31,036        | -       | 43,031 | 19,756         | -       | 22,178 | 30,559 |
| Os XI-2A: GOBOL SAIL      | 2                      | -       | 1    | 31,967        | -       | 42,680 | 15,857         | -       | 21,485 | 26,869 |
| Os XI-3B2: LIU XU         | 1                      | 1       | 1    | 23,628        | 31,519  | 23,625 | 14,308         | 16,786  | 19,427 | 32,223 |
| Os XI-2B: LARHA MUGAD     | 1                      | -       | 1    | 29,618        | -       | 38,265 | 15,838         | -       | 19,437 | 25,832 |
| Os cA1: N22               | 1                      | 1       | 1    | 43,709        | 50,872  | 29,457 | 26,290         | 24,509  | 21,098 | 43,742 |
| Os cA2: NATEL BORO        | 1                      | 1       | 1    | 37,614        | 41,834  | 28,826 | 17,928         | 20,225  | 21,157 | 35,923 |

<sup>a</sup> this row shows the number of PacBio SMRT cells.

**Supplemental Table 3.** RNA-Seq and from multiple tissues (i.e., leaves, roots, and immature panicles) of 16 rice accessions.

| Accessions                | Biological Replication <sup>a</sup> |         |      | Alignment Rate |         |        |
|---------------------------|-------------------------------------|---------|------|----------------|---------|--------|
|                           | Leaf                                | Panicle | Root | Leaf           | Panicle | Root   |
| Os GJ-temp: Nipponbare    | 1                                   | 1       | 1    | 99.54%         | 99.29%  | 99.57% |
| Os GJ-subtrp: CHAO MEO    | 1                                   | 1       | 1    | 96.14%         | 93.87%  | 92.04% |
| Os GJ-trop1: Azucena      | 1                                   | 1       | 1    | 99.50%         | 99.41%  | 98.48% |
| Os GJ-trop2: KETAN NANGKA | 1                                   | 1       | 1    | 71.11%         | 37.23%  | 17.79% |
| Os cB: ARC 10497          | 1                                   | -       | 1    | 98.54%         | -       | 94.72% |
| Os XI-1B2: PR 106         | 1                                   | 1       | 1    | 62.25%         | 29.27%  | 20.68% |
| Os XI-adm: MH63           | 2                                   | 2       | 2    | 95.12%         | 89.89%  | 85.26% |
| Os XI-1B1: IR 64          | 1                                   | 1       | 1    | 99.24%         | 99.22%  | 98.29% |
| Os XI-1A: ZS97            | 2                                   | 2       | 2    | 88.25%         | 88.36%  | 60.60% |
| Os XI-3A: LIMA            | 1                                   | -       | 1    | 98.56%         | -       | 96.37% |
| Os XI-3B1: KHAO YAI GUANG | 1                                   | 1       | 1    | 94.99%         | -       | 99.45% |
| Os XI-2A: GOBOL SAIL      | 1                                   | -       | 1    | 96.66%         | -       | 93.84% |
| Os XI-3B2: LIU XU         | 1                                   | 1       | 1    | 99.51%         | 99.29%  | 99.42% |
| Os XI-2B: LARHA MUGAD     | 1                                   | -       | 1    | 86.39%         | -       | 78.36% |
| Os cA1: N22               | 1                                   | 1       | 1    | 99.60%         | 99.73%  | 98.58% |
| Os cA2: NATEL BORO        | 1                                   | 1       | 1    | 96.37%         | 86.24%  | 86.43% |

<sup>a</sup>. this row shows the number of biological replications.

**Supplemental Table 4.** Numbers of annotated genes in 16 rice accessions.

| Accession Assembly Annotation                              | Annotated Genes | Genes from Iso-Seq Data |
|------------------------------------------------------------|-----------------|-------------------------|
| Os GJ-temp: Nipponbare   IRGSP 1.0   MSU                   | 55,801          | -                       |
| Os GJ-temp: Nipponbare   IRGSP 1.0   RAPdb                 | 37,859          | -                       |
| Os GJ-temp: Nipponbare   IRGSP 1.0   Gramene(+IsoSeq)      | 38,404          | 733                     |
| Os GJ-subtrp: CHAO MEO   Os132278RS1   Gramene(+IsoSeq)    | 37,240          | 1,054                   |
| Os GJ-trop1: Azucena   AzucenaRS1   Gramene(+IsoSeq)       | 36,882          | 1,079                   |
| Os GJ-trop2: KETAN NANGKA   Os128077RS1   Gramene(+IsoSeq) | 37,994          | 1,388                   |
| Os cB: ARC 10497   Os117425RS1   Gramene(+IsoSeq)          | 37,181          | 844                     |
| Os XI-1B2: PR 106   Os127742RS1   Gramene(+IsoSeq)         | 36,720          | 1,255                   |
| Os XI-adm: Minghui 63   MH63RS3   HZAU                     | 59,903          | -                       |
| Os XI-1B1: IR 64   OsIR64RS1   Gramene(+IsoSeq)            | 36,925          | 987                     |
| Os XI-1A: Zhenshan 97   ZS97RS3   HZAU                     | 60,935          | -                       |
| Os XI-3A: LIMA   Os127564RS1   Gramene(+IsoSeq)            | 37,994          | 973                     |
| Os XI-3B1: KHAO YAI GUANG   Os127518RS1   Gramene(+IsoSeq) | 37,522          | 1,105                   |
| Os XI-2A: GOBOL SAIL   Os132424RS1   Gramene(+IsoSeq)      | 36,467          | 1,810                   |
| Os XI-3B2: LIU XU   Os125827RS1   Gramene(+IsoSeq)         | 44,942          | 1,183                   |
| Os XI-2B: LARHA MUGAD   Os125619RS1   Gramene(+IsoSeq)     | 37,474          | 1,244                   |
| Os cA1: N22   OsN22RS2   Gramene(+IsoSeq)                  | 37,598          | 1,280                   |
| Os cA2: NATEL BORO   Os127652RS1   Gramene(+IsoSeq)        | 36,392          | 1,664                   |

**Supplemental Table 5.** Summary of alternative splicing events in 16 rice accessions.

| Accession Assembly Annotation                              | A3    | A5    | AF  | AL  | MX  | RI    | SE    | Total  |
|------------------------------------------------------------|-------|-------|-----|-----|-----|-------|-------|--------|
| Os GJ-temp: Nipponbare   IRGSP 1.0   Gramene(+IsoSeq)      | 1,250 | 634   | 237 | 91  | 2   | 1,181 | 326   | 3,721  |
| Os GJ-subtrp: CHAO MEO   Os132278RS1   Gramene(+IsoSeq)    | 2,761 | 2,574 | 530 | 182 | 113 | 2,228 | 1,715 | 10,103 |
| Os GJ-trop1: Azucena   AzucenaRS1   Gramene(+IsoSeq)       | 2,735 | 2,583 | 575 | 187 | 100 | 2,257 | 1,719 | 10,156 |
| Os GJ-trop2: KETAN NANGKA   Os128077RS1   Gramene(+IsoSeq) | 2,484 | 2,350 | 509 | 167 | 101 | 2,072 | 1,581 | 9,264  |
| Os cB: ARC 10497   Os117425RS1   Gramene(+IsoSeq)          | 2,253 | 2,009 | 451 | 151 | 91  | 1,912 | 1,396 | 8,263  |
| Os XI-1B2: PR 106   Os127742RS1   Gramene(+IsoSeq)         | 2,530 | 2,415 | 519 | 169 | 116 | 2,153 | 1,637 | 9,539  |
| Os XI-adm: Minghui 63   MH63RS3   HZAU                     | -     | -     | -   | -   | -   | -     | -     | -      |
| Os XI-1B1: IR 64   OsIR64RS1   Gramene(+IsoSeq)            | 2,634 | 2,434 | 546 | 208 | 96  | 2,177 | 1,646 | 9,741  |
| Os XI-1A: Zhenshan 97   ZS97RS3   HZAU                     | -     | -     | -   | -   | -   | -     | -     | -      |
| Os XI-3A: LIMA   Os127564RS1   Gramene(+IsoSeq)            | 1,841 | 1,670 | 367 | 127 | 62  | 1,791 | 1,182 | 7,040  |
| Os XI-3B1: KHAO YAI GUANG   Os127518RS1   Gramene(+IsoSeq) | 1,986 | 1,770 | 403 | 149 | 60  | 1,792 | 1,236 | 7,396  |
| Os XI-2A: GOBOL SAIL   Os132424RS1   Gramene(+IsoSeq)      | 1,563 | 1,355 | 351 | 115 | 45  | 1,450 | 940   | 5,819  |
| Os XI-3B2: LIU XU   Os125827RS1   Gramene(+IsoSeq)         | 2,537 | 2,424 | 493 | 168 | 97  | 1,981 | 1,683 | 9,383  |
| Os XI-2B: LARHA MUGAD   Os125619RS1   Gramene(+IsoSeq)     | 1,803 | 1,588 | 377 | 154 | 57  | 1,611 | 1,129 | 6,719  |
| Os cA1: N22   OsN22RS2   Gramene(+IsoSeq)                  | 2,742 | 2,548 | 514 | 937 | 108 | 2,464 | 1,705 | 11,018 |
| Os cA2: NATEL BORO   Os127652RS1   Gramene(+IsoSeq)        | 2,281 | 2,198 | 474 | 156 | 104 | 1,796 | 1,469 | 8,478  |



**Supplemental Table 6.** Homologues of gene LOC\_Os11g29290 in 16 accessions. The result was produced by the “Homologues” module and checked manually. “RBH” means reciprocal best hits, “NA” means no homologous relationship.

| <b>Accession Assembly Annotation</b>                       | <b>Homologous</b>  | <b>Type</b> |
|------------------------------------------------------------|--------------------|-------------|
| Os GJ-temp: Nipponbare   IRGSP 1.0   MSU                   | LOC_Os11g29290     | RBH         |
| Os GJ-temp: Nipponbare   IRGSP 1.0   RAPdb                 | Os11g0483000       | RBH         |
| Os GJ-temp: Nipponbare   IRGSP 1.0   Gramene(+IsoSeq)      | OsNip_11g0483000   | RBH         |
| Os GJ-subtrp: CHAO MEO   Os132278RS1   Gramene(+IsoSeq)    | OsCMeo_11g0013950  | RBH         |
| Os GJ-trop1: Azucena   AzucenaRS1   Gramene(+IsoSeq)       | OsAzu_11g0014030   | RBH         |
| Os GJ-trop2: KETAN NANGKA   Os128077RS1   Gramene(+IsoSeq) | OsKeNa_11g0013990  | RBH         |
| Os cB: ARC 10497   Os117425RS1   Gramene(+IsoSeq)          | OsARC_11g0013770   | RBH         |
| Os XI-1B2: PR 106   Os127742RS1   Gramene(+IsoSeq)         | OsPr106_11g0014050 | RBH         |
| Os XI-adm: Minghui 63   MH63RS3   HZAU                     | OsMH63_11G0261700  | RBH         |
| Os XI-1B1: IR 64   OsIR64RS1   Gramene(+IsoSeq)            | NA                 | NA          |
| Os XI-1A: Zhenshan 97   ZS97RS3   HZAU                     | OsZS97_11G0273800  | RBH         |
| Os XI-3A: LIMA   Os127564RS1   Gramene(+IsoSeq)            | OsLima_11g0014120  | RBH         |
| Os XI-3B1: KHAO YAI GUANG   Os127518RS1   Gramene(+IsoSeq) | OsKYG_11g0014170   | RBH         |
| Os XI-2A: GOBOL SAIL   Os132424RS1   Gramene(+IsoSeq)      | OsGoSa_11g0013820  | RBH         |
| Os XI-3B2: LIU XU   Os125827RS1   Gramene(+IsoSeq)         | OsLiXu_11g0013660  | RBH         |
| Os XI-2B: LARHA MUGAD   Os125619RS1   Gramene(+IsoSeq)     | OsLaMu_11g0013960  | RBH         |
| Os cA1: N22   OsN22RS2   Gramene(+IsoSeq)                  | OsN22_11G013780    | RBH         |
| Os cA2: NATEL BORO   Os127652RS1   Gramene(+IsoSeq)        | OsNaBo_11g0014000  | RBH         |

## Supplemental References

- Buels, R., Yao, E., Diesh, C.M., Hayes, R.D., Munoz-Torres, M., Helt, G., Goodstein, D.M., Elsik, C.G., Lewis, S.E., Stein, L., et al.** (2016). JBrowse: a dynamic web platform for genome visualization and analysis. *Genome Biology* **17**:66. 10.1186/s13059-016-0924-1.
- Camacho, C., Coulouris, G., Avagyan, V., Ma, N., Papadopoulos, J., Bealer, K., and Madden, T.L.** (2009). BLAST+: architecture and applications. *BMC Bioinformatics* **10**:421. 10.1186/1471-2105-10-421.
- Capella-Gutiérrez, S., Silla-Martínez, J.M., and Gabaldón, T.** (2009). trimAl: a tool for automated alignment trimming in large-scale phylogenetic analyses. *Bioinformatics* **25**:1972-1973. 10.1093/bioinformatics/btp348.
- Chen, Y., Song, W., Xie, X., Wang, Z., Guan, P., Peng, H., Jiao, Y., Ni, Z., Sun, Q., and Guo, W.** (2020). A Collinearity-Incorporating Homology Inference Strategy for Connecting Emerging Assemblies in the Triticeae Tribe as a Pilot Practice in the Plant Pangenomic Era. *Molecular Plant* **13**:1694-1708. 10.1016/j.molp.2020.09.019.
- Jones, P., Binns, D., Chang, H.-Y., Fraser, M., Li, W., McAnulla, C., McWilliam, H., Maslen, J., Mitchell, A., Nuka, G., et al.** (2014). InterProScan 5: genome-scale protein function classification. *Bioinformatics* **30**:1236-1240. 10.1093/bioinformatics/btu031.
- Katoh, K., and Standley, D.M.** (2013). MAFFT Multiple Sequence Alignment Software Version 7: Improvements in Performance and Usability. *Molecular Biology and Evolution* **30**:772-780. 10.1093/molbev/mst010.
- Kim, D., Paggi, J.M., Park, C., Bennett, C., and Salzberg, S.L.** (2019). Graph-based genome alignment and genotyping with HISAT2 and HISAT-genotype. *Nature Biotechnology* **37**:907-915. 10.1038/s41587-019-0201-4.
- Kuo, R.I., Cheng, Y., Zhang, R., Brown, J.W.S., Smith, J., Archibald, A.L., and Burt, D.W.** (2020). Illuminating the dark side of the human transcriptome with long read transcript sequencing. *BMC Genomics* **21**:751. 10.1186/s12864-020-07123-7.
- Li, H.** (2018). Minimap2: pairwise alignment for nucleotide sequences. *Bioinformatics* **34**:3094-3100. 10.1093/bioinformatics/bty191.
- McColl, W.F., Noshita, K.** (1986). On the number of edges in the transitive closure of a graph. *Discrete Applied Mathematics* **15**:67-73. 10.1016/0166-218X(86)90020-X
- Nguyen, L.-T., Schmidt, H.A., von Haeseler, A., and Minh, B.Q.** (2014). IQ-TREE: A Fast and Effective Stochastic Algorithm for Estimating Maximum-Likelihood Phylogenies. *Molecular Biology and Evolution* **32**:268-274. 10.1093/molbev/msu300.
- Pertea, M., Pertea, G.M., Antonescu, C.M., Chang, T.-C., Mendell, J.T., and Salzberg, S.L.** (2015). StringTie enables improved reconstruction of a transcriptome from RNA-seq reads. *Nature Biotechnology* **33**:290-295. 10.1038/nbt.3122.
- Priyam, A., Woodcroft, B.J., Rai, V., Moghul, I., Munagala, A., Ter, F., Chowdhary, H., Pieniak, I., Maynard, L.J., Gibbins, M.A., et al.** (2019). Sequenceserver: A Modern Graphical User Interface for Custom BLAST Databases. *Molecular Biology and Evolution* **36**:2922-2924. 10.1093/molbev/msz185.
- Tardaguila, M., de la Fuente, L., Marti, C., Pereira, C., Pardo-Palacios, F.J., Del Risco, H., Ferrell, M., Mellado, M., Macchietto, M., Verheggen, K., et al.** (2018). SQANTI: extensive characterization of long-read transcript sequences for quality control in full-length transcriptome identification and quantification. *Genome Res* **28**:396-411. 10.1101/gr.222976.117.
- Trincado, J.L., Entizne, J.C., Hysenaj, G., Singh, B., Skalic, M., Elliott, D.J., and Eyra, E.** (2018).

SUPPA2: fast, accurate, and uncertainty-aware differential splicing analysis across multiple conditions. *Genome Biology* **19**:40. 10.1186/s13059-018-1417-1.

**van Dongen, S.** (2000). A cluster algorithm for graphs. *Information Systems*.

**Wang, W., Mauleon, R., Hu, Z., Chebotarov, D., Tai, S., Wu, Z., Li, M., Zheng, T., Fuentes, R.R., Zhang, F., et al.** (2018). Genomic variation in 3,010 diverse accessions of Asian cultivated rice. *Nature* **557**:43-49. 10.1038/s41586-018-0063-9.

**Yu, G., Smith, D.K., Zhu, H., Guan, Y., and Lam, T.T.-Y.** (2017). ggtree: an r package for visualization and annotation of phylogenetic trees with their covariates and other associated data. *Methods in Ecology and Evolution* **8**:28-36. 10.1111/2041-210X.12628.
